# Supplementary material
Source: Springer Nature journal article supplement (https://www.springermedizin.de/resource/supplementary/13012_2009_229_MOESM2_ESM.pdf/9629510)
Supplement: MOESM2 [file 9629510]

### **Pre study data collection**

Focus groups and interviews with mental health and primary care professional and patients who observed DVD of proposed intervention.

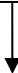

### **MAIN TRIAL PLATFORM STUDY**

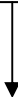

### **Post study data collection**

Interviews with patients and case managers who participated in the trial (and therefore the actual intervention).
